# Supplementary material
Source: PubMed Central journal article supplement (PMC9164119)
Supplement: jamaophthalmol-e221640-s001.pdf [file jamaophthalmol-e221640-s001.pdf]

## Supplementary Online Content

Chew EY, Clemons TE, Agrón E, et al; AREDS2 Research Group. Long-term outcomes of adding lutein/zeaxanthin and  $\omega$ -3 fatty acids to the AREDS supplements on age-related macular degeneration progression: AREDS2 report 28. *JAMA Ophthalmol*. Published online June 2, 2022. doi:10.1001/jamaophthalmol.2022.1640

**eFigure 1.** Original AREDS2 Study Design

**eFigure 2.** AREDS2 10-Year Follow-up Study Design

**eFigure 3.** Number of AREDS2 Participants in 10-Year Follow-up

**eFigure 4.** Main Effects of Beta carotene Analysis

**eFigure 5.** Detailed Evaluation of Beta carotene and Zinc in Secondary Randomization by the Primary Randomization Group

**eFigure 6.** AREDS2 10-Year Follow-up Study—Main Effects of Lutein/Zeaxanthin and  $\omega$ -3 Fatty Acids

**eFigure 7.** Progression to Late AMD by Main Effects: Lutein/Zeaxanthin vs No Lutein/Zeaxanthin

**eFigure 8.** Progression to Late AMD by Comparing Directly Lutein/Zeaxanthin vs Beta carotene

**eFigure 9.** Progression to Late AMD by Treatment With and Without  $\omega$ -3 Fatty Acids

**eFigure 10.** Progression to Late AMD by the 4 Primary Treatment Groups, Lutein/Zeaxanthin, DHA/EPA, Lutein/Zeaxanthin and DHA + EPA, and Controls

**eFigure 11.** Mortality by Lutein/Zeaxanthin Assignment

**eFigure 12.** Mortality by DHA/EPA Assignment

**eFigure 13.** Mortality by Beta carotene

**eFigure 14.** Mortality by Zinc Level

**eTable.** Characteristics of AREDS2 Participants by Participation Status in the 10-Year Follow-up

**eMethods**

**eResults**

**eDiscussion**

**eReferences**

This supplementary material has been provided by the authors to give readers additional information about their work.

eFigure 1. Original AREDS2 Study Design<sup>1</sup>

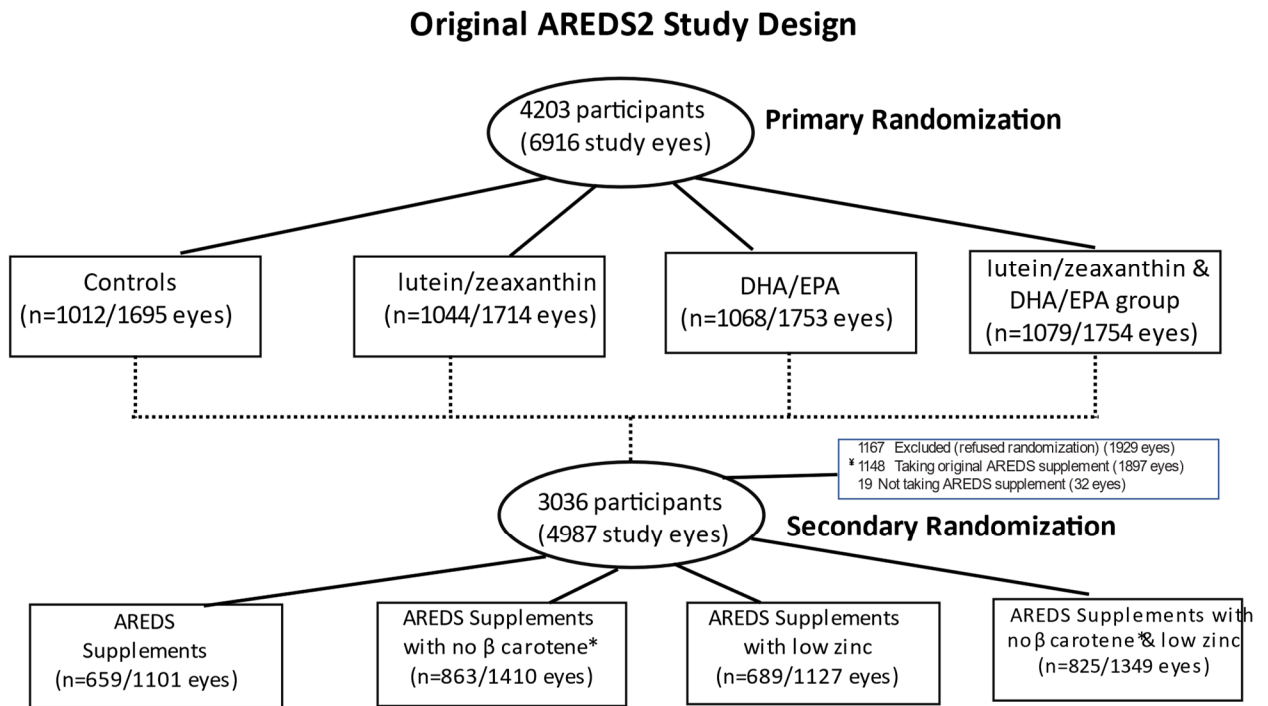

¥1148/4203 (original cohort) opted out of the secondary randomization. They chose to take the original AREDS supplements.

\*Smokers were randomized only to these 2 groups (with no beta-carotene). Beta-carotene was given only to participants who were not current smokers or who stopped smoking for 1 or more year.

**eFigure 2. AREDS2 10-Year Follow-up Study Design**

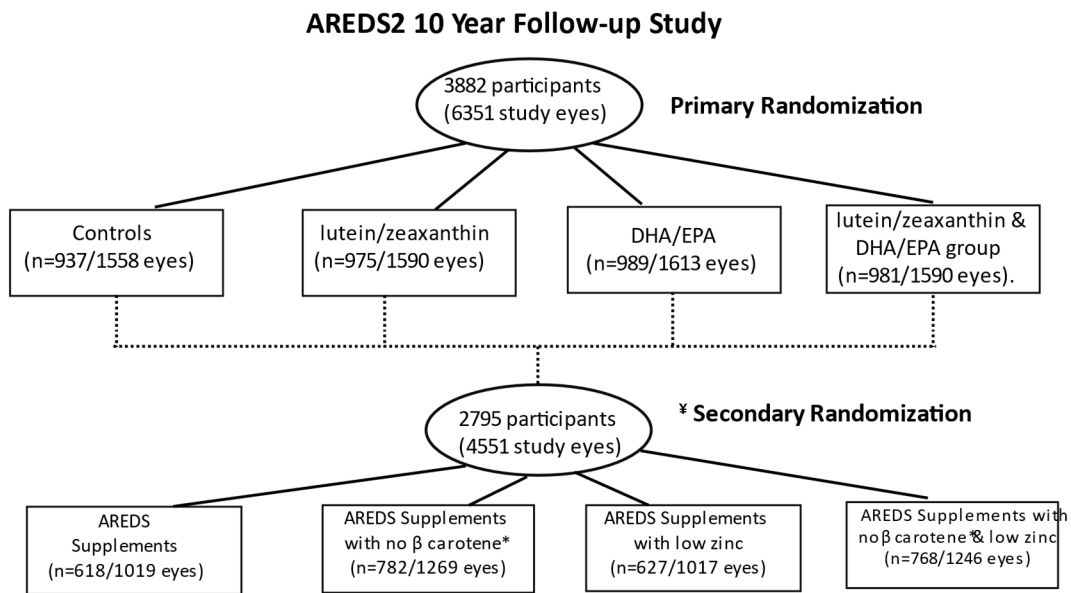

¥1087 (original cohort) opted out of the secondary randomization. They chose to take the original AREDS supplements.

\*Smokers were randomized only to these 2 groups (with no beta-carotene). Beta-carotene was given only to participants who were not current smokers or who stopped smoking for 1 or more year.

**eFigure 3. Number of AREDS2 Participants in 10-Year Follow-up**

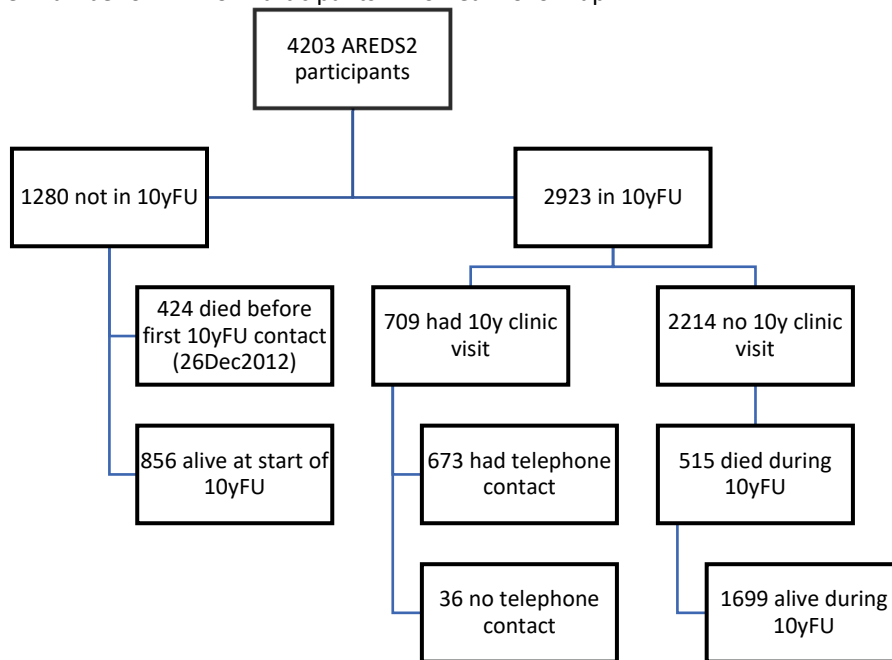

**Footnotes:**

Of the 424 that died before the first FO contact (26Dec2012), 407 died before the last 5-year close-out visit date (8Nov2012), and 17 died between the last close-out visit and the first 10yFO telephone call (26Dec2012)

\*At baseline, 208 participants had bilateral late AMD, 111 had no follow-up color fundus photographs in either eye and 2 had unilateral late AMD at baseline but the non-AMD eye had no gradable follow-up color fundus photographs (leaving **3882** with intermediate AMD in at least one eye eligible for analyses of late AMD)

**eFigure 4.** Main Effects of Beta carotene Analysis

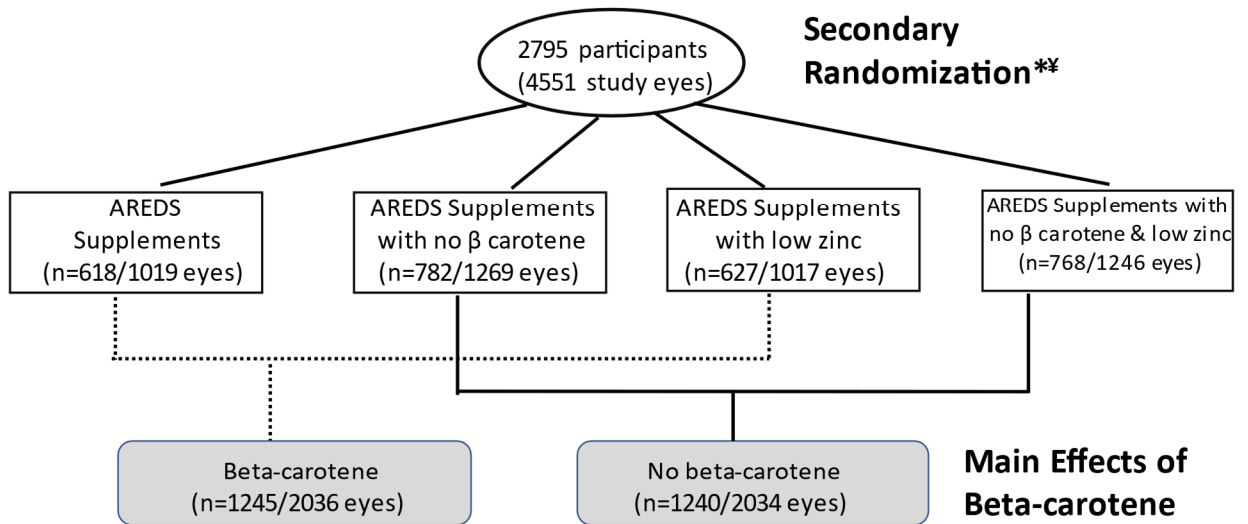

Smokers were randomized only to the groups with no beta-carotene. Beta-carotene was given only to participants who were not current smokers or who stopped smoking for 1 or more year.

**eFigure 5.** Detailed Evaluation of Beta carotene and Zinc in Secondary Randomization by the Primary Randomization Group

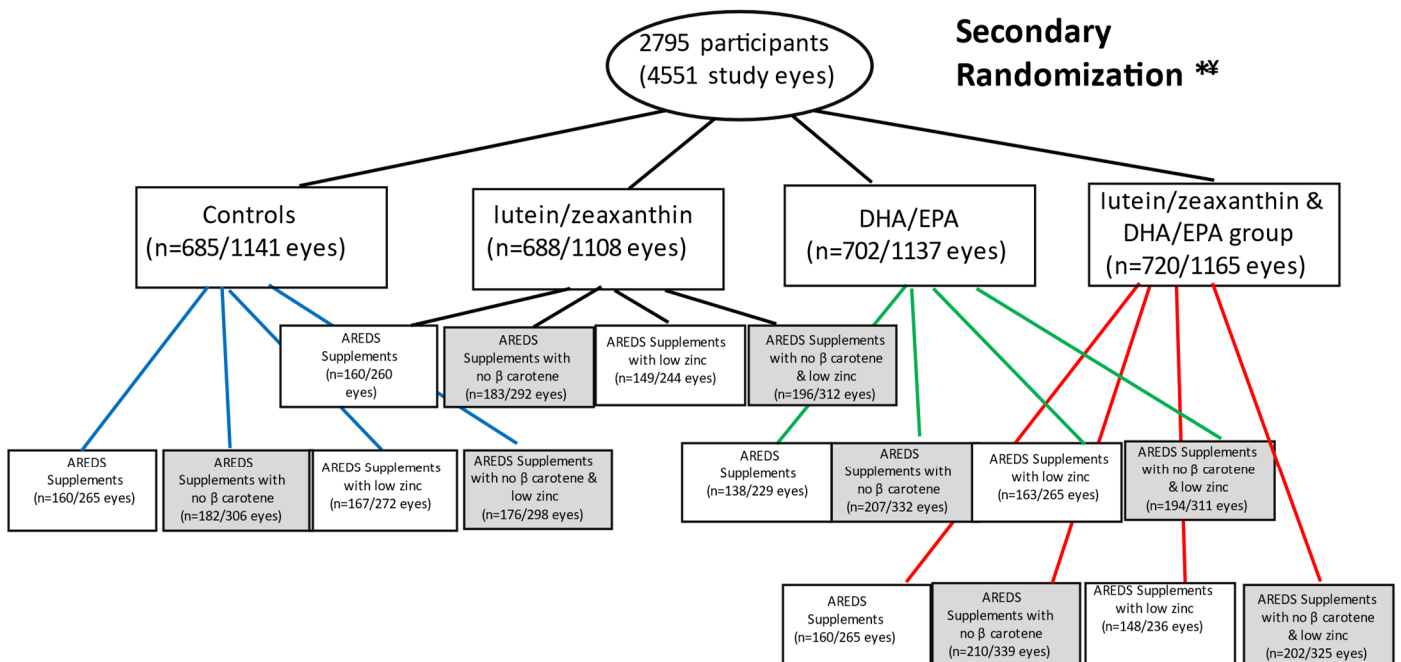

¥1087 (original cohort) opted out of the secondary randomization. They chose to take the original AREDS supplements.

\*Smokers were randomized only to the groups with no beta-carotene. Beta-carotene was given only to participants who were not current smokers or who stopped smoking for 1 or more year.

**eFigure 6.** AREDS2 10-Year Follow-up Study—Main Effects of Lutein/Zeaxanthin and  $\omega$ -3 Fatty Acids

### AREDS2 10 Y Follow-up Study-Main Effects of Lutein/Zeaxanthin and DHA/EPA

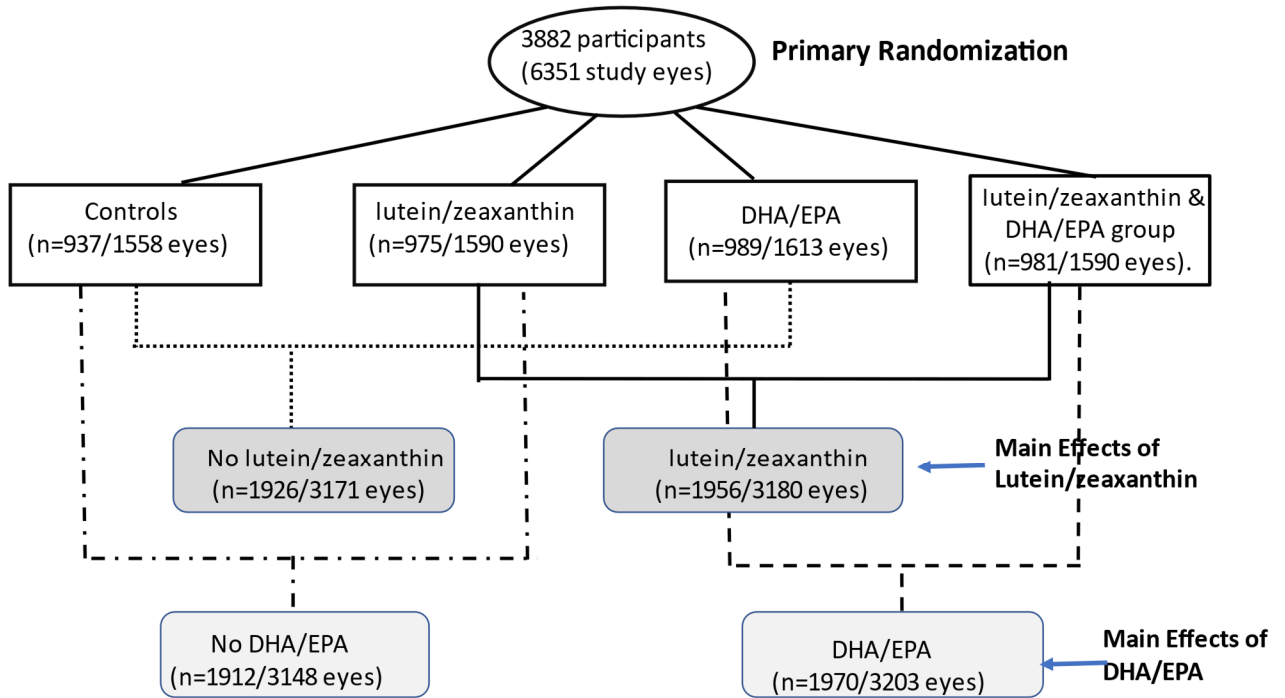

**eFigure 7.** Progression to Late AMD by Main Effects: Lutein/Zeaxanthin vs No Lutein/Zeaxanthin

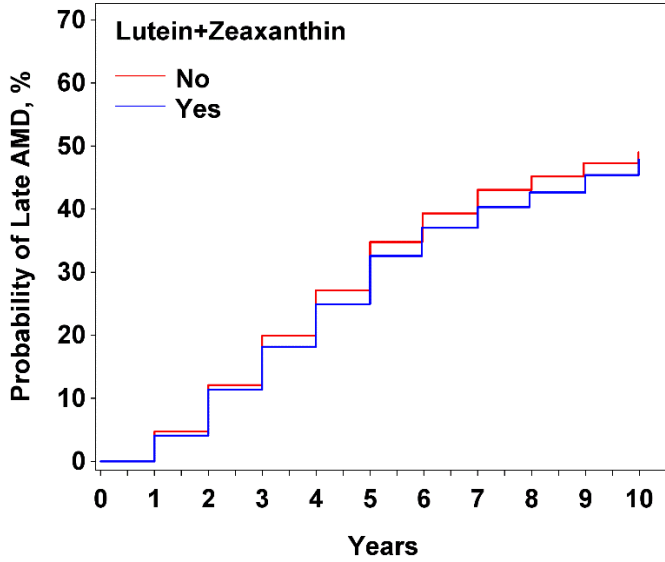

| No. eyes at risk     |                                                        |
|----------------------|--------------------------------------------------------|
| No Lutein+Zeaxanthin | 3171 2990 2688 2385 2096 1724 1487 1361 1280 1192 1028 |
| Lutein+Zeaxanthin    | 3180 3014 2705 2400 2126 1723 1524 1413 1315 1196 1051 |

**eFigure 8.** Progression to Late AMD by Comparing Directly Lutein/Zeaxanthin vs Beta carotene

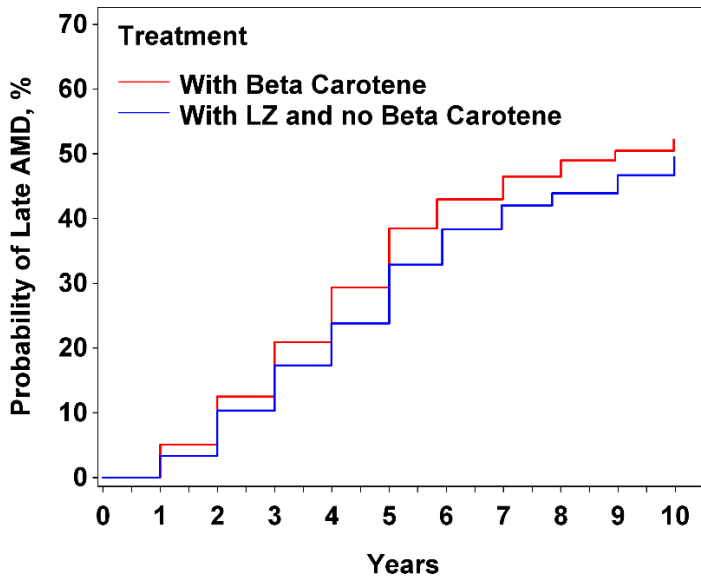

| No. eyes at risk   |                                              |
|--------------------|----------------------------------------------|
| With Beta Carotene | 1031 965 856 756 649 517 444 409 382 356 311 |
| With LZ and no BC  | 1026 979 887 786 701 550 473 435 414 375 329 |

**eFigure 9.** Progression to Late AMD by Treatment With and Without  $\omega$ -3 Fatty Acids

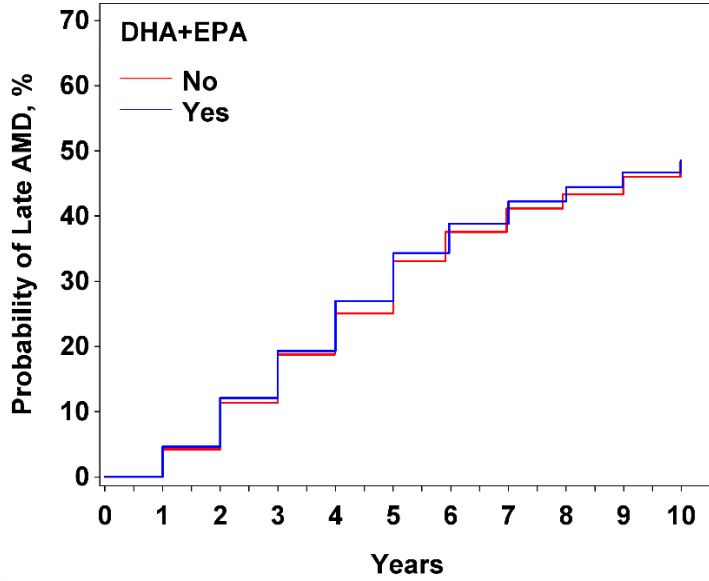

| No. eyes at risk |                                                        |
|------------------|--------------------------------------------------------|
| No DHA+EPA       | 3148 2984 2691 2397 2139 1741 1531 1412 1318 1207 1065 |
| DHA+EPA          | 3203 3020 2702 2388 2083 1706 1480 1362 1277 1181 1014 |

DHA and EPA: docosahexaenoic acid [DHA] and eicosapentaenoic acid [EPA]

**eFigure 10.** Progression to Late AMD by the 4 Primary Treatment Groups, Lutein/Zeaxanthin, DHA/EPA, Lutein/Zeaxanthin and DHA + EPA, and Controls

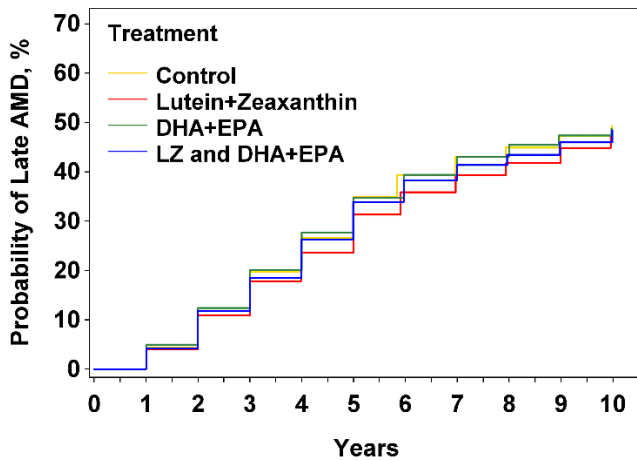

| No. eyes at risk  |                                                  |
|-------------------|--------------------------------------------------|
| Control           | 1558 1475 1321 1176 1041 851 741 679 640 598 526 |
| Lutein+Zeaxanthin | 1590 1509 1370 1221 1098 890 790 733 678 609 539 |
| DHA+EPA           | 1613 1515 1367 1209 1055 873 746 682 640 594 502 |
| LZ and DHA+EPA    | 1590 1505 1335 1179 1028 833 734 680 637 587 512 |

DHA and EPA: docosahexaenoic acid [DHA] and eicosapentaenoic acid [EPA]

LZ: Lutein/zeaxanthin

**eFigure 11.** Mortality by Lutein/Zeaxanthin Assignment

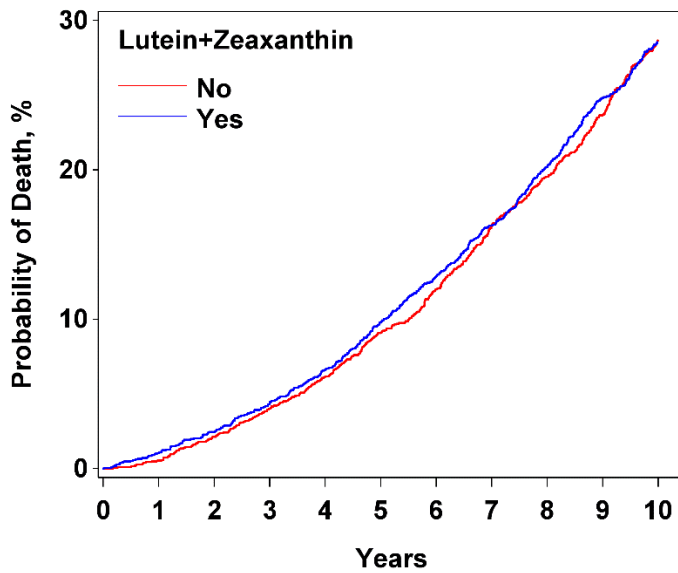

| No. at risk          | 0    | 1    | 2    | 3    | 4    | 5    | 6    | 7    | 8    | 9    | 10   |
|----------------------|------|------|------|------|------|------|------|------|------|------|------|
| No Lutein+Zeaxanthin | 2080 | 2064 | 2024 | 1976 | 1912 | 1757 | 1594 | 1510 | 1436 | 1350 | 1190 |
| Lutein+Zeaxanthin    | 2123 | 2093 | 2060 | 2011 | 1937 | 1761 | 1593 | 1520 | 1434 | 1338 | 1218 |

**eFigure 12.** Mortality by DHA/EPA Assignment

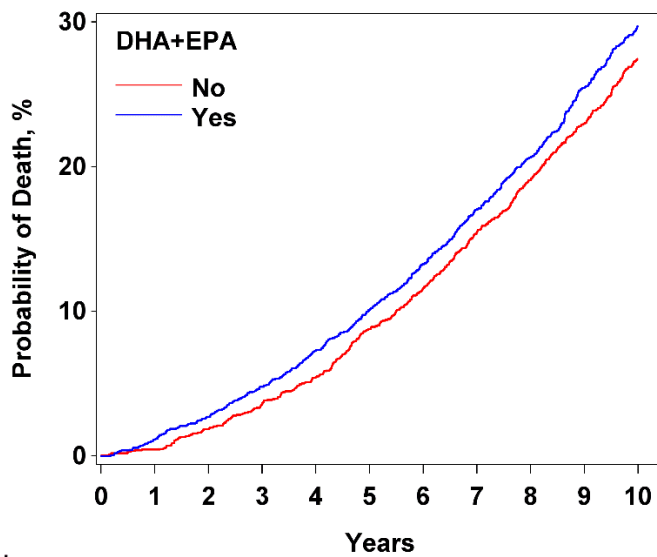

| No. at risk | 0    | 1    | 2    | 3    | 4    | 5    | 6    | 7    | 8    | 9    | 10   |
|-------------|------|------|------|------|------|------|------|------|------|------|------|
| No DHA+EPA  | 2056 | 2040 | 2007 | 1962 | 1898 | 1734 | 1562 | 1484 | 1403 | 1326 | 1191 |
| DHA+EPA     | 2147 | 2117 | 2077 | 2025 | 1951 | 1784 | 1625 | 1546 | 1467 | 1362 | 1217 |

DHA and EPA: docosahexaenoic acid [DHA] and eicosapentaenoic acid [EPA]



**eFigure 13.** Mortality by Beta carotene

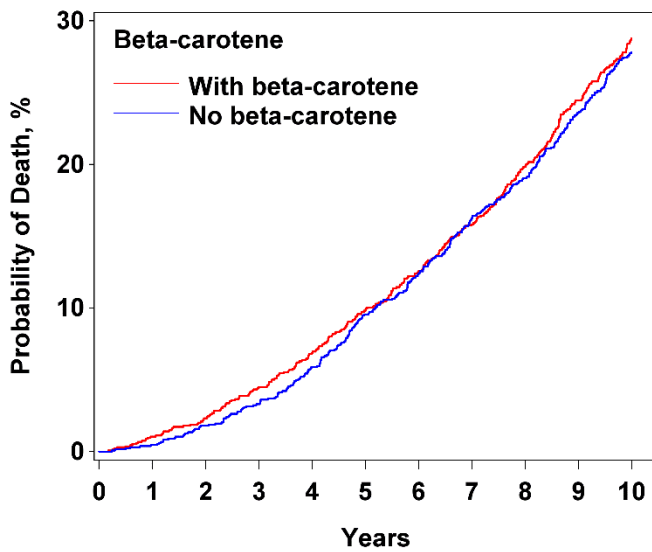

| No. at risk        |                                                    |
|--------------------|----------------------------------------------------|
| With beta-carotene | 1348 1330 1310 1276 1229 1130 1021 977 919 861 783 |
| No beta-carotene   | 1341 1329 1308 1283 1235 1117 1004 956 916 854 771 |

**eFigure 14.** Mortality by Zinc Level

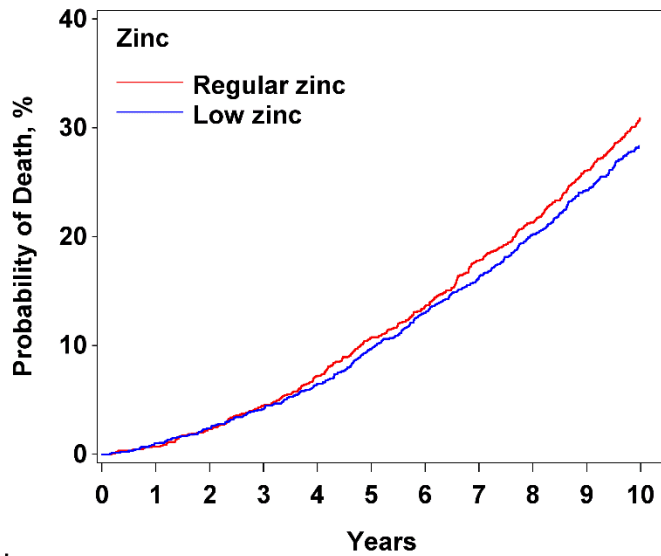

| No. at risk  |                                                      |
|--------------|------------------------------------------------------|
| Regular zinc | 1522 1507 1478 1439 1381 1251 1125 1063 1004 933 830 |
| Low zinc     | 1514 1493 1568 1436 1385 1262 1138 1093 1033 973 887 |

Low zinc: 25 mg, Regular Zinc, 80 mg Zinc oxide



| <b>eTable. Characteristics of AREDS2 Participants by Participation Status in the 10-Year Follow-up</b> |               |                                               |                             |         |
|--------------------------------------------------------------------------------------------------------|---------------|-----------------------------------------------|-----------------------------|---------|
|                                                                                                        | In 10-year FO | Not in 10-year FO<br>and alive at start of FO | Died prior to<br>10-year FO | P value |
| Participants                                                                                           | 2923          | 856                                           | 424                         |         |
| Mean age (years)                                                                                       | 72.0 (SD 7.7) | 74.9 (SD 7.8)                                 | 77.4 (SD 5.9)               | <.0001  |
| Male                                                                                                   |               |                                               |                             |         |
| Female                                                                                                 | 1688 (57.7)   | 507 (59.2)                                    | 192 (45.3)                  | <.0001  |
| Male                                                                                                   | 1235 (42.3)   | 349 (40.8)                                    | 232 (54.7)                  |         |
| Race                                                                                                   |               |                                               |                             |         |
| Non-white                                                                                              | 85 (2.9)      | 56 (6.5)                                      | 4 (0.9)                     | <.0001  |
| White                                                                                                  | 2838 (97.1)   | 800 (93.5)                                    | 420 (99.1)                  |         |
| Education                                                                                              |               |                                               |                             | <.0001  |
| Unknown                                                                                                | 51 (1.7)      | 19 (2.2)                                      | 8 (1.9)                     |         |
| High school or less                                                                                    | 836 (28.6)    | 329 (38.4)                                    | 172 (40.6)                  |         |
| At least some college                                                                                  | 1376 (47.1)   | 370 (43.2)                                    | 178 (42)                    |         |
| Post-graduate                                                                                          | 660 (22.6)    | 138 (16.1)                                    | 66 (15.6)                   |         |
| Smoking                                                                                                |               |                                               |                             | .001    |
| Never                                                                                                  | 1300 (44.5)   | 371 (43.3)                                    | 153 (36.1)                  |         |
| Former                                                                                                 | 1449 (49.6)   | 421 (49.2)                                    | 227 (53.5)                  |         |
| Current                                                                                                | 174 (6.0)     | 64 (7.5)                                      | 44 (10.4)                   |         |
| Aspirin use                                                                                            |               |                                               |                             | .030    |
| No                                                                                                     | 1497 (51.2)   | 457 (53.4)                                    | 192 (45.3)                  |         |
| Yes, <2/day                                                                                            | 1387 (47.5)   | 389 (45.4)                                    | 230 (54.2)                  |         |
| Yes, 2+/day                                                                                            | 39 (1.3)      | 10 (1.2)                                      | 2 (0.5)                     |         |
| Acetaminophen use                                                                                      |               |                                               |                             | .575    |
| No                                                                                                     | 2658 (90.9)   | 769 (89.8)                                    | 387 (91.3)                  |         |
| Yes                                                                                                    | 265 (9.1)     | 87 (10.2)                                     | 37 (8.7)                    |         |
| NSAID use                                                                                              |               |                                               |                             | .030    |
| No                                                                                                     | 2596 (88.8)   | 757 (88.4)                                    | 394 (92.9)                  |         |
| Yes                                                                                                    | 327 (11.2)    | 99 (11.6)                                     | 30 (7.1)                    |         |
| Cholesterol drug use                                                                                   |               |                                               |                             | .095    |
| No                                                                                                     | 1655 (56.6)   | 463 (54.1)                                    | 219 (51.7)                  |         |
| Yes                                                                                                    | 1268 (43.4)   | 393 (45.9)                                    | 205 (48.3)                  |         |
| Diabetes                                                                                               |               |                                               |                             | <.0001  |
| No                                                                                                     | 2593 (88.7)   | 726 (84.8)                                    | 338 (79.7)                  |         |
| Yes                                                                                                    | 330 (11.3)    | 130 (15.2)                                    | 86 (20.3)                   |         |
| Hx hypertension                                                                                        |               |                                               |                             | <.0001  |
| Unknown                                                                                                | 4 (0.1)       | 2 (0.2)                                       | 0 (0)                       |         |
| No                                                                                                     | 1269 (43.4)   | 331 (38.7)                                    | 128 (30.2)                  |         |
| Yes                                                                                                    | 1650 (56.4)   | 523 (61.1)                                    | 296 (69.8)                  |         |
| Hx CHF                                                                                                 |               |                                               |                             | <.0001  |
| Unknown                                                                                                | 8 (0.3)       | 7 (0.8)                                       | 3 (0.7)                     |         |
| No                                                                                                     | 2845 (97.3)   | 811 (94.7)                                    | 382 (90.1)                  |         |
| Yes                                                                                                    | 70 (2.4)      | 38 (4.4)                                      | 39 (9.2)                    |         |
| Hx CHD                                                                                                 |               |                                               |                             | <.0001  |
| Unknown                                                                                                | 21 (0.7)      | 13 (1.5)                                      | 3 (0.7)                     |         |
| No                                                                                                     | 2659 (91)     | 752 (87.9)                                    | 350 (82.5)                  |         |
| Yes                                                                                                    | 243 (8.3)     | 91 (10.6)                                     | 71 (16.7)                   |         |
| Hx angina                                                                                              |               |                                               |                             | 0.0048  |
| Unknown                                                                                                | 11 (0.4)      | 4 (0.5)                                       | 2 (0.5)                     |         |
| No                                                                                                     | 2789 (95.4)   | 810 (94.6)                                    | 389 (91.7)                  |         |
| Yes                                                                                                    | 123 (4.2)     | 42 (4.9)                                      | 33 (7.8)                    |         |
| Hx MI                                                                                                  |               |                                               |                             | <.0001  |
| Unknown                                                                                                | 11 (0.4)      | 2 (0.2)                                       | 0 (0)                       |         |
| No                                                                                                     | 2752 (94.1)   | 788 (92.1)                                    | 357 (84.2)                  |         |
| Yes                                                                                                    | 160 (5.5)     | 66 (7.7)                                      | 67 (15.8)                   |         |
| Hx stroke                                                                                              |               |                                               |                             |         |
| Unknown                                                                                                | 10 (0.3)      | 5 (0.6)                                       | 2 (0.5)                     | <.0001  |
| No                                                                                                     | 2800 (95.8)   | 796 (93)                                      | 379 (89.4)                  |         |
| Yes                                                                                                    | 113 (3.9)     | 55 (6.4)                                      | 43 (10.1)                   |         |
| Hypercholesterolemia                                                                                   |               |                                               |                             | .722    |
| Unknown                                                                                                | 7 (0.2)       | 3 (0.4)                                       | 3 (0.7)                     |         |
| No                                                                                                     | 1244 (42.6)   | 355 (41.5)                                    | 185 (43.6)                  |         |
| Yes                                                                                                    | 1672 (57.2)   | 498 (58.2)                                    | 236 (55.7)                  |         |
| Baseline best AMD severity score                                                                       |               |                                               |                             | <.0001  |
| Cannot determine                                                                                       | 3 (0.1)       | 0 (0)                                         | 0 (0)                       |         |
| 1-6                                                                                                    | 1555 (53.2)   | 399 (46.6)                                    | 193 (45.5)                  |         |

|                                   |             |            |            |        |
|-----------------------------------|-------------|------------|------------|--------|
| 7                                 | 1014 (34.7) | 308 (36.0) | 144 (34.0) |        |
| 8                                 | 232 (7.9)   | 98 (11.4)  | 52 (12.3)  |        |
| 9                                 | 104 (3.6)   | 45 (5.3)   | 32 (7.5)   |        |
| 10                                | 5 (0.2)     | 2 (0.2)    | 0 (0)      |        |
| 11                                | 10 (0.3)    | 4 (0.5)    | 3 (0.7)    |        |
| Baseline worse AMD severity score |             |            |            | <.0001 |
| Cannot determine                  | 3 (0.1)     | 0 (0)      | 0 (0)      |        |
| 1-6                               | 708 (24.2)  | 170 (19.9) | 63 (14.9)  |        |
| 7                                 | 893 (30.6)  | 226 (26.4) | 88 (20.8)  |        |
| 8                                 | 266 (9.1)   | 88 (10.3)  | 48 (11.3)  |        |
| 9                                 | 112 (3.8)   | 38 (4.4)   | 23 (5.4)   |        |
| 10                                | 94 (3.2)    | 41 (4.8)   | 28 (6.6)   |        |
| 11                                | 847 (29.0)  | 293 (34.2) | 174 (41.0) |        |
|                                   |             |            |            |        |

## eMethods

The AREDS2 was a double-masked placebo-controlled trial that used a 2x2 factorial design to evaluate the addition of lutein/zeaxanthin (10 mg/2 mg), omega-3 fatty acids (350 mg DHA and 650 mg EPA), or both, to the original AREDS formulation of 80 mg zinc oxide, 2 mg cupric oxide, 500 mg vitamin C, 400 international units vitamin E, and 15 mg beta-carotene.<sup>1</sup> Participants were offered an optional secondary randomization that tested modifications of the original AREDS supplement, specifically 25 mg vs. 80 mg of zinc oxide and 15 mg vs. no beta-carotene (eFigure 1). Only participants who never smoked or stopped smoking for more than 1 year were randomly assigned to the AREDS supplements that contained beta-carotene.

This phase 3 randomized controlled clinical trial enrolled, between 2006 and 2008, 4203 participants (aged 55 to 85 years) in 82 retinal specialty clinics in the United States. All participants had intermediate AMD (large drusen) in both eyes or in one eye while the fellow eye had late AMD. The research was conducted under the tenets of the Declaration of Helsinki and was compliant with the Health Insurance Portability and Accountability Act.

***Rationale for an epidemiologic follow-up study.*** Long-term follow-up studies of completed randomized trials have often been used to assess the durability of the treatment effects, both risks and benefits, beyond the period of randomization. Examples include the long-term follow-up of AREDS to evaluate the effects of AREDS supplement on progression to late AMD;<sup>2</sup> the decades-long follow-up of patients enrolled in the Diabetes Control and Complications Trial (DCCT), named the Epidemiology of Diabetes Interventions and Complications (EDIC), designed to evaluate the effects of the treatment of tight glycemic control on progression of diabetic retinopathy;<sup>3</sup> and the long-term follow-up of participants enrolled in the Physicians' Health Study, assessing the post-trial effect of vitamins on cancer.<sup>4</sup> These all represent post-trial analyses from epidemiologic follow-up beyond the period of the randomized intervention while retaining the intent-to-treat principle analyses. They have the advantage of increasing study power, by longer follow-up time, while retaining the benefit of the original randomization (i.e., avoiding issues of confounding and reverse causation). They provide insights by relating health outcomes back to the original randomization, irrespective of subsequent exposures that might occur following the end of the clinical trial. Thus, the entire period during the clinical trial and the subsequent follow-up period were included in the analyses.

***Progression to late AMD.*** In the AREDS2 follow-up study, participants who had bilateral late AMD at study enrollment at the beginning of the clinical trial were excluded. As previously reported, 11 patients who were enrolled into AREDS2 were subsequently determined to have had bilateral late AMD at baseline, and thus were excluded from those original analyses.<sup>5</sup> Our previous analyses defined late AMD as neovascular AMD or central geographic atrophy (GA) on color fundus photographs. Since the

publication of the results of the AREDS2 clinical trial, experts in the field of AMD research concluded that non-central GA should be included as part of this subtype of late AMD,<sup>6</sup> and the AREDS2 classification was updated to reflect the inclusion of non-central GA in late AMD. For this reason, we also excluded AREDS2 participants who had non-central GA at baseline of the clinical trial as they would have been considered to have late AMD. As was the case in the 5-year clinical trial, each participant included in the follow-up study had at least one eligible study eye that was free of late AMD.

## eResults

The number of deaths is greater than the 368 deaths reported in the primary analysis<sup>5</sup>, as the additional deaths were unknown and previously considered as losses to follow-up. Deaths in general were identified from reports from family and contacts of the participants and verified with death certificates. It should be noted that all participants who died during the study contributed to the analyses of this current study until the participant was censored at time of death, development of late AMD, study end or lost to follow-up.

As noted above, 11 participants were excluded from the original analyses because of the presence of bilateral late AMD at baseline. Following the change in the outcome measure of late AMD from central GA to include any GA, an additional 197 participants were found to have bilateral late AMD at baseline. After excluding them and the 113 participants with no follow-up fundus photographs, a total of 3882 participants (6351 study eyes) were eligible for the analyses of progression to late AMD. All participants (4203) enrolled in the original study were evaluated for mortality.

The baseline characteristics of both participants and non-participants of the follow-up study who were evaluated are presented in eTable 1. As expected, not all requests for medical records to validate the self-report diagnoses resulted in responses from the treating physicians. However, approximately 90% of all the self-reported cases were confirmed to be positive in the 10 year in-clinic visits while 35% of the self-reports of AMD progression were not fully validated. Approximately 50% of lung cancers were confirmed by medical records.

## eDiscussion

Data from both human<sup>7</sup> and animal<sup>8</sup> studies demonstrate that the simultaneous consumption of high doses of lutein/zeaxanthin and beta-carotene suppresses both the serum and tissue levels of lutein/zeaxanthin, because of competitive absorption of carotenoids. Since both beta-carotene and lutein are transported in the blood by the same carrier, beta-carotene tends to suppress the absorption of lutein/zeaxanthin in both the blood and the tissues. This competitive absorption was well demonstrated in the AREDS serum data, the presence of beta-carotene suppressed the serum levels of lutein at years 1 and 5 by as much as 33% compared to baseline.<sup>9</sup> In the AREDS2 clinical trial, at year 5, the serum levels of lutein/zeaxanthin in those participants who were randomly assigned to receive lutein/zeaxanthin with the beta-carotene-containing AREDS supplement were lower (39.1 [SD, 18.7] µg/dL) than those participants who received the beta-carotene-free AREDS supplement (46.9 [SD, 20.3] µg/dL) ( $p=0.02$ ).<sup>5</sup>

## eReferences

1. Chew EY, Clemons T, SanGiovanni JP, et al. The Age-Related Eye Disease Study 2 (AREDS2): study design and baseline characteristics (AREDS2 report number 1). *Ophthalmology*. Nov 2012;119(11):2282-9. doi:10.1016/j.ophtha.2012.05.027
2. Chew EY, Clemons TE, Agrón E, et al. Ten-year follow-up of age-related macular degeneration in the age-related eye disease study: AREDS report no. 36. *JAMA Ophthalmol*. Mar 2014;132(3):272-7. doi:10.1001/jamaophthalmol.2013.6636
3. Lachin JM, White NH, Hainsworth DP, Sun W, Cleary PA, Nathan DM. Effect of intensive diabetes therapy on the progression of diabetic retinopathy in patients with type 1 diabetes: 18 years of follow-up in the DCCT/EDIC. *Diabetes*. Feb 2015;64(2):631-42. doi:10.2337/db14-0930
4. Wang L, Sesso HD, Glynn RJ, et al. Vitamin E and C supplementation and risk of cancer in men: posttrial follow-up in the Physicians' Health Study II randomized trial. *The American journal of clinical nutrition*. Sep 2014;100(3):915-23. doi:10.3945/ajcn.114.085480
5. Lutein + zeaxanthin and omega-3 fatty acids for age-related macular degeneration: the Age-Related Eye Disease Study 2 (AREDS2) randomized clinical trial. *Jama*. May 15 2013;309(19):2005-15. doi:10.1001/jama.2013.4997
6. Ferris FL, 3rd, Wilkinson CP, Bird A, et al. Clinical classification of age-related macular degeneration. *Ophthalmology*. Apr 2013;120(4):844-51. doi:10.1016/j.ophtha.2012.10.036
7. Yeum KJ, Russell RM. Carotenoid bioavailability and bioconversion. *Annual review of nutrition*. 2002;22:483-504. doi:10.1146/annurev.nutr.22.010402.102834
8. Wang Y, Roger Illingworth D, Connor SL, Barton Duell P, Connor WE. Competitive inhibition of carotenoid transport and tissue concentrations by high dose supplements of lutein, zeaxanthin and beta-carotene. *European journal of nutrition*. Sep 2010;49(6):327-36. doi:10.1007/s00394-009-0089-8
9. A randomized, placebo-controlled, clinical trial of high-dose supplementation with vitamins C and E, beta carotene, and zinc for age-related macular degeneration and vision loss: AREDS report no. 8. *Arch Ophthalmol*. Oct 2001;119(10):1417-36. doi:10.1001/archophth.119.10.1417
