# Supplementary material
Source: PubMed Central journal article supplement (PMC9164119)
Supplement: jamaophthalmol-e221640-s002.pdf [file jamaophthalmol-e221640-s002.pdf]

\*First name, last name, and suffix (if applicable) are required and will appear in PubMed.

| <b>*Group Name(s): AREDS2 Research Group</b> |                   |                              |                  |                                   |                                                                  |                                                              |                                                                                            |
|----------------------------------------------|-------------------|------------------------------|------------------|-----------------------------------|------------------------------------------------------------------|--------------------------------------------------------------|--------------------------------------------------------------------------------------------|
| <b>*First Name and Middle Initial(s)</b>     | <b>*Last Name</b> | <b>*Suffix (eg, Jr, III)</b> | Academic Degrees | Institution                       | Location (city, state/province, country)<br><u>United States</u> | Role or Contribution, eg, chair, principal investigator      | Group (if more than 1 Group listed in the byline) and/or Subgroup (eg, Steering Committee) |
| John Paul                                    | SanGiovanni       |                              | ScD              | NEI/NIH                           | Bethesda, MA                                                     | Project officer/administrative duties , concept and analyses |                                                                                            |
| Federick L                                   | Ferris            | III                          | MD               | NEI/NIH                           | Bethesda                                                         | Study Design/interpretation s of data analyses               |                                                                                            |
| Ronald P                                     | Danis             |                              | MD               | U. of Wisconsin                   | Madison, WI                                                      | Reading Center Chair/analyses of data                        |                                                                                            |
| Barbara A                                    | Blodi             |                              | MD               | U. of Wisconsin                   | Madison, WI                                                      | Collected data                                               |                                                                                            |
| Alan J                                       | Ruby              |                              | MD               | Vision Research Foundation        | Royal Oak, MI                                                    | Collected data                                               |                                                                                            |
| Andrew                                       | Antoszyk          |                              | MD               | Charlotte Eye Ear & Thraote ASSoc | Charlotte, NC                                                    | collected data                                               |                                                                                            |
| Michael                                      | Klein             |                              | MD               | Casey Eye Institute               | Portland, OR                                                     | collected data                                               |                                                                                            |
| Ivana                                        | Kim               |                              | MD               | Massachusetts Eye & Ear Infirmary | Boston, MA                                                       | Collected data                                               |                                                                                            |
| Gary Edd                                     | Fish              |                              | MD, JD           | Texas retina Assoc                | Dallas, TX                                                       | collected data                                               |                                                                                            |
| Wai T                                        | Wong              |                              | MD, PhD          | NEI/NIH                           | Bethesda, MD                                                     | Design & collected data/analyses of data                     |                                                                                            |
| David H                                      | Orth              |                              | MD               | Ingalls Memorial Hospital         | Harvey, IL                                                       | Collected data                                               |                                                                                            |
| Kourous                                      | Rezaei            |                              | MD               | Ingalls Memorial Hospital         | Harvey, IL                                                       | Collected data                                               |                                                                                            |
| Susan B                                      | Bressler          |                              | MD               | Wilmer Eye Institute              | Baltimore, MD                                                    | Collected data                                               |                                                                                            |
| G Baker                                      | Hubbard           |                              | MD               | Emory University                  | Atlanta, GA                                                      | Collected data                                               |                                                                                            |
| Michael J                                    | Elman             |                              | MD               | Elman Retina Group                | Baltimore, MD                                                    | Collected data                                               |                                                                                            |
| Suresh                                       | Chandra           |                              | MD               | U. of Wisconsin                   | Madison, WI                                                      | Collected data                                               |                                                                                            |

## Supplemental Online Content: Nonauthor Collaborators

\*First name, last name, and suffix (if applicable) are required and will appear in PubMed.

| *First Name and Middle Initial(s) | *Last Name   | *Suffix (eg, Jr, III) | Academic Degrees | Institution                                    | Location (city, state/province, country)<br><u>United States</u> | Role or Contribution, eg, chair, principal investigator | Group (if more than 1 Group listed in the byline) and/or Subgroup (eg, Steering Committee) |
|-----------------------------------|--------------|-----------------------|------------------|------------------------------------------------|------------------------------------------------------------------|---------------------------------------------------------|--------------------------------------------------------------------------------------------|
| Thomas                            | Friberg      |                       | MD               | U. of Pittsburgh Medical Center                | Pittsburgh, PA                                                   | Collected data                                          |                                                                                            |
| Michael                           | Tolentino    |                       | MD               | Center for Retina & Macular Diseases           | Winterhaven, FL                                                  | Collected data                                          |                                                                                            |
| Darmakusuma                       | Le           |                       | MD               | Delaware Vally Retina Assoc                    | Lawrence, NJ                                                     | Collected data                                          |                                                                                            |
| Mary B                            | Lansing      |                       | MD               | Eldorado Retina Assoc                          | Louisville, CO                                                   | Collected data                                          |                                                                                            |
| Jay B                             | Stallman     |                       | MD               | Georgia Retina                                 | Decatur, GA                                                      | Collected data                                          |                                                                                            |
| Paul A                            | Edwards      |                       | MD               | Henry Ford Health Systems                      | Detroit, MI                                                      | Collected data                                          |                                                                                            |
| Carl W                            | Baker        |                       | MD               | Paducah Retinal Center                         | Peducah, KY                                                      | Collected data                                          |                                                                                            |
| Michael A                         | Novak        |                       | MD               | Retina Assoc of Cleveland                      | Cleveland, OH                                                    | Collected data                                          |                                                                                            |
| Ricky D                           | Isernhagen   |                       | MD               | Retina Assoc of Kentucky                       | Lexington, KY                                                    | Collected data                                          |                                                                                            |
| Todd E                            | Schneiderman |                       | MD               | Retina Center Northwest                        | Silverdale, WA                                                   | Collected data                                          |                                                                                            |
| Lawrence                          | Halperin     |                       | MD               | Retina group of Florida                        | Portland, OR                                                     | Collected data                                          |                                                                                            |
| Michael                           | Lee          |                       |                  | Retina Northwest, PC                           | Portland, OR                                                     | Collected data                                          |                                                                                            |
| David                             | Boyer        |                       | MD               | Retina-Vitreous Assoc Medical Group            | Beverly Hills, CA                                                | Collected data                                          |                                                                                            |
| Philip                            | Rosenfeld    |                       | MD, PhD          | Bascom Palmer                                  | Miami, FL                                                        | Collected data                                          |                                                                                            |
| Pamela                            | Rath         |                       | MD               | Retina vitreous Consultants                    | Pittsburgh, PA                                                   | Collected data                                          |                                                                                            |
| Marc                              | Levy         |                       | MD               | Sarasota Retina Institute                      | Sarasota, FL                                                     | Collected data                                          |                                                                                            |
| Robert H                          | Rosa         | Jr                    | MD               | Scott & White Memorial Hospital                | Temple, Tx                                                       | Collected data                                          |                                                                                            |
| John                              | Hoskins      |                       | MD               | Southeastern Retina Assoc                      | Knoxville, Tx                                                    | Collected data                                          |                                                                                            |
| Clement K                         | Chan         |                       | MD               | Souther California Desert Retina               | Palm Desert, CA                                                  | Collected data                                          |                                                                                            |
| David M                           | Brown        |                       | MD               | Retina Consultans of Houston                   | Houston, TX                                                      | Collected data                                          |                                                                                            |
| Craig                             | Greven       |                       | MD               | Wake Forest U. Eye Center                      | Winston-Salem, NC                                                | Collected data                                          |                                                                                            |
| J Michael                         | Jumper       |                       | MD               | west Coast Retina Medical Group                | San Francisco, Ca                                                | Collected data                                          |                                                                                            |
| Linda                             | Margulies    |                       | MD               | Veterans Affairs, North California Health Care | Martinez, CA                                                     | Collected data                                          |                                                                                            |

## Supplemental Online Content: Nonauthor Collaborators

\*First name, last name, and suffix (if applicable) are required and will appear in PubMed.

| *First Name and Middle Initial(s) | *Last Name | *Suffix (eg, Jr, III) | Academic Degrees | Institution                                                  | Location (city, state/province, country)<br><u>United States</u> | Role or Contribution, eg, chair, principal investigator | Group (if more than 1 Group listed in the byline) and/or Subgroup (eg, Steering Committee) |
|-----------------------------------|------------|-----------------------|------------------|--------------------------------------------------------------|------------------------------------------------------------------|---------------------------------------------------------|--------------------------------------------------------------------------------------------|
| William                           | Rosenthal  |                       | MD               | Mid-America Retina Consultants                               | Kansas City, MO                                                  | Collected data                                          |                                                                                            |
| Richard                           | Rosen      |                       | MD               | New York Eye & Ear Infirmary                                 | New York, NY                                                     | Collected data                                          |                                                                                            |
| Glenn                             | Stoller    |                       | MD               | Ophthalmic Consultants of Long Island                        | Lynbrook, NY                                                     | Collected data                                          |                                                                                            |
| Fadi                              | El Baba    |                       | MD               | SUNY/Stony Brook Research Foundation, Dept. of Ophthalmology | Stony Brook, NY                                                  | Collected data                                          |                                                                                            |
| W Copley                          | McLean     | Jr                    | MD               | Western Carolina Retinal assoc                               | Ashville, NC                                                     | Collected data                                          |                                                                                            |
| Ronald                            | Kingsley   |                       | MD               | Dean McGee Eye Institute                                     | Oklahoma City,                                                   | Collected data                                          |                                                                                            |
| Alice                             | Lyon       |                       | MD               | Northwestern U                                               | Chicago, IL                                                      | Collected data                                          |                                                                                            |
| Jeffrey                           | Heier      |                       | MD               | Ophthalmic Consultants of Boston                             | Boston, MA                                                       | Collected data                                          |                                                                                            |
| Anne                              | Fung       |                       | MD               | Pacific eye associates                                       | San Francisco, Ca                                                | Collected data                                          |                                                                                            |
| Ingrid                            | Scott      |                       | MD               | Penn State, MS Hershey Medical Center                        | Hershey, PA                                                      | Collected data                                          |                                                                                            |
| John                              | Wells      |                       | MD               | Palmetto Retina Center                                       | West Columbia, SC                                                | Collected data                                          |                                                                                            |
| Michael                           | Banach     |                       | MD               | Pennsylvania Retina Specialists                              | Camp Hill, PA                                                    | Collected data                                          |                                                                                            |
| Paul                              | Beer       |                       | MD               | Retina Consultans                                            | Singerlands, NY                                                  | Collected data                                          |                                                                                            |
| James                             | Folk       |                       | MD               | U of Iowa                                                    | Iowa City, IA                                                    | Collected data                                          |                                                                                            |
| Joseph                            | Maguire    |                       | MD               | Mid Atlantic Retina                                          | Philadelphia, PA                                                 | Collected data                                          |                                                                                            |
| SriniVas                          | Sadda      |                       | Md               | Doheny Eye Institute                                         | Los Angeles, CA                                                  | Collected data                                          |                                                                                            |
| Richard                           | Garfinkel  |                       | MD               | Retina group of Washington                                   | Chevy Chase, MD                                                  | Collected data                                          |                                                                                            |
| Judy E                            | Kim        |                       | MD               | Medical College of Wisconsin                                 | Milwaukee, WI                                                    | Collected data                                          |                                                                                            |
| Paul                              | Berstein   |                       | MD, PhD          | U. of Utah                                                   | Salt Lake City, UT                                               | Collected data                                          |                                                                                            |
| Michael                           | Rauser     |                       | MD               | Loma Linda U                                                 | Loma Linda, CA                                                   | Collected data                                          |                                                                                            |
| Richard Alan                      | Lewis      |                       | MD, MS           | Baylor College of Medicine                                   | Houston, TX                                                      | Collected data                                          |                                                                                            |
| Barron C                          | Fishburne  |                       | MD               | Carolina Retina Center                                       | Columbia, SC                                                     | Collected data                                          |                                                                                            |
| Suber                             | Huang      |                       | MD, MBA          | Case Wester Reserve U                                        | Cleveland, OH                                                    | Collected data                                          |                                                                                            |
| Nelson R                          | Sabates    |                       | MD               | Eye Foundation of Kansas City                                | Kansas City, MO                                                  | Collected data                                          |                                                                                            |
| Nicola                            | Kim        |                       | MD               | Jones Eye Institute                                          | Little Rock, AR                                                  | Collected data                                          |                                                                                            |

## Supplemental Online Content: Nonauthor Collaborators

\*First name, last name, and suffix (if applicable) are required and will appear in PubMed.

| *First Name and Middle Initial(s) | *Last Name | *Suffix (eg, Jr, III) | Academic Degrees | Institution                                | Location (city, state/province, country)<br><u>United States</u> | Role or Contribution, eg, chair, principal investigator | Group (if more than 1 Group listed in the byline) and/or Subgroup (eg, Steering Committee) |
|-----------------------------------|------------|-----------------------|------------------|--------------------------------------------|------------------------------------------------------------------|---------------------------------------------------------|--------------------------------------------------------------------------------------------|
| Robert N                          | Frank      |                       | MD               | Kresge Eye Institute                       | Detroit, MI                                                      | Collected data                                          |                                                                                            |
| Brian                             | Joondeph   |                       | MD               | Colorado Retina Assoc                      | Denver, CO                                                       | Collected data                                          |                                                                                            |
| Odette                            | Houghton   |                       | MD               | U of North Carolina                        | Chapel Hill, NC                                                  | Collected data                                          |                                                                                            |
| Dean                              | Hainsworth |                       | MD               | University Health Care-Mason Eye Institute | Columbia, MO                                                     | Collected data                                          |                                                                                            |
| Edward                            | Chaum      |                       | MD, PhD          | U. of Tennessee, Hamilton Eye Institute    | Memphis, TN                                                      | Collected data                                          |                                                                                            |
| Robert                            | Millay     |                       | MD               | Fletcher Allen Health Care                 | Burlington, VT                                                   | Collected data                                          |                                                                                            |
| Raymond                           | Iezzi      |                       | MD               | Mayo Clinic                                | Rochester, MN                                                    | Collected data                                          |                                                                                            |
| Rajendra                          | Apte       |                       | MD, PhD          | Barnes Retina Institute, Washington U      | ST. Louis, MO                                                    | Collected data                                          |                                                                                            |
| Ron                               | Adelman    |                       | MD               | Yale University                            | New Haven, CT                                                    | Collected data                                          |                                                                                            |
| Anita                             | Agrawal    |                       | MD               | Vanderbilt Eye Institute                   | Nashville, TN                                                    | Collected data                                          |                                                                                            |
| Neelakshi                         | Bhagat     |                       | MD, MPH          | UMDNJ-New Jersey Medical School            | Newark, NJ                                                       | Collected data                                          |                                                                                            |
| Lawrence                          | Ulanski    | II                    | MD               | U. of Illinois, at Chicago                 | Chicago, IL                                                      | Collected data                                          |                                                                                            |
| Steven                            | Schwartz   |                       | MD               | Jules Stein Eye Institute/UCLA             | Los Angeles, CA                                                  | Collected data                                          |                                                                                            |
| Cynthia                           | Owsley     |                       | PhD              | U o Alabama at Birmingham                  | Birmingham, AL                                                   | Collected data                                          |                                                                                            |
| Alan J                            | Letson     |                       | MD               | Ohio State U                               | Columbus, OH                                                     | Collected data                                          |                                                                                            |
| Yu-Guang                          | HE         |                       | MD               | UT Southwestern Medical Center             | Dallas, Tx                                                       | Collected data                                          |                                                                                            |
| Cynthia                           | Toth       |                       | MD               | Duke U                                     | Durham, NC                                                       | Collected data                                          |                                                                                            |
| Lawrence                          | Morse      |                       | MD, PhD          | U. of California, Davis                    | Sacramento, CA                                                   | Collected data                                          |                                                                                            |
| Michael                           | Cooney     |                       | MD               | Manhattan Eye, Ear & Throat                | New York, NY                                                     | Collected data                                          |                                                                                            |
| Sandeep                           | Grover     |                       | MD               | U. of Florida                              | Jacksonville, FL                                                 | Collected data                                          |                                                                                            |
| Henry                             | Ferreyra   |                       | MD               | Shiley Eye Center                          | La Jolla, CA                                                     | Collected data                                          |                                                                                            |
| Alexander J                       | Brucker    |                       | MD               | U. of Pennsylvania, Scheie Eye Institute   | Philadelphia, PA                                                 | Collected data                                          |                                                                                            |
| David                             | DiLoreto   |                       | MD               | U of Rochester Eye Institute               | Rochester, NY                                                    | Collected data                                          |                                                                                            |
| Aaron                             | Weinberg   |                       | MD               | NorthShore University Health Systems       | Glenview, IL                                                     | Collected data                                          |                                                                                            |
